# Supplementary material for: Grief and bereavement of family and friends around medical assistance in dying: scoping review
Source: PubMed Central journal article supplement — BMJ Support Palliat Care. 2022 Sep 13;13(4):414–28. doi: 10.1136/spcare-2022-003715 (PMC10803956; doi:10.1136/spcare-2022-003715), 2022-09-13
Supplement: spcare-2022-003715supp001.pdf [file spcare-2022-003715supp001.pdf]

**Appendix 1: Search Strategy**

MEDLINE (Ovid) – Search conducted June 22, 2021

| # ▲ | Searches                                                                                                                                                                                                                                                                                                   | Results |
|-----|------------------------------------------------------------------------------------------------------------------------------------------------------------------------------------------------------------------------------------------------------------------------------------------------------------|---------|
| 1   | Suicide, Assisted/                                                                                                                                                                                                                                                                                         | 5804    |
| 2   | euthanasia/ or euthanasia, active/ or euthanasia, passive/                                                                                                                                                                                                                                                 | 12959   |
| 3   | exp Euthanasia, Active, Voluntary/                                                                                                                                                                                                                                                                         | 1777    |
| 4   | exp Right to Die/                                                                                                                                                                                                                                                                                          | 4937    |
| 5   | medical assistance in dying.mp.                                                                                                                                                                                                                                                                            | 246     |
| 6   | MAiD.mp.                                                                                                                                                                                                                                                                                                   | 432     |
| 7   | physician aid in dying.mp.                                                                                                                                                                                                                                                                                 | 73      |
| 8   | assisted suicide\$.mp.                                                                                                                                                                                                                                                                                     | 3158    |
| 9   | assisted death\$.mp.                                                                                                                                                                                                                                                                                       | 521     |
| 10  | euthanasia.mp.                                                                                                                                                                                                                                                                                             | 28565   |
| 11  | right to die.mp.                                                                                                                                                                                                                                                                                           | 5248    |
| 12  | 1 or 2 or 3 or 4 or 5 or 6 or 7 or 8 or 9 or 10 or 11                                                                                                                                                                                                                                                      | 32912   |
| 13  | exp Grief/                                                                                                                                                                                                                                                                                                 | 9129    |
| 14  | exp Bereavement/                                                                                                                                                                                                                                                                                           | 13810   |
| 15  | (grief or griev\$).mp. [mp=title, abstract, original title, name of substance word, subject heading word, floating sub-heading word, keyword heading word, organism supplementary concept word, protocol supplementary concept word, rare disease supplementary concept word, unique identifier, synonyms] | 15428   |
| 16  | mourn\$.mp.                                                                                                                                                                                                                                                                                                | 1991    |
| 17  | bereave\$.mp.                                                                                                                                                                                                                                                                                              | 10589   |
| 18  | 13 or 14 or 15 or 16 or 17                                                                                                                                                                                                                                                                                 | 22619   |
| 19  | 12 and 18                                                                                                                                                                                                                                                                                                  | 291     |

EMBASE (Ovid) – Search conducted June 22, 2021

| # ▲ | Searches                                                                                                                                                                                                      | Results |
|-----|---------------------------------------------------------------------------------------------------------------------------------------------------------------------------------------------------------------|---------|
| 1   | Suicide, Assisted/                                                                                                                                                                                            | 5252    |
| 2   | euthanasia/ or euthanasia, active/ or euthanasia, passive/                                                                                                                                                    | 21099   |
| 3   | exp Euthanasia, Active, Voluntary/                                                                                                                                                                            | 1450    |
| 4   | exp Right to Die/                                                                                                                                                                                             | 4050    |
| 5   | medical assistance in dying.mp.                                                                                                                                                                               | 289     |
| 6   | MAiD.mp.                                                                                                                                                                                                      | 607     |
| 7   | physician aid in dying.mp.                                                                                                                                                                                    | 89      |
| 8   | assisted suicide\$.mp.                                                                                                                                                                                        | 6424    |
| 9   | assisted death\$.mp.                                                                                                                                                                                          | 595     |
| 10  | euthanasia.mp.                                                                                                                                                                                                | 33405   |
| 11  | right to die.mp.                                                                                                                                                                                              | 4500    |
| 12  | 1 or 2 or 3 or 4 or 5 or 6 or 7 or 8 or 9 or 10 or 11                                                                                                                                                         | 37660   |
| 13  | exp Grief/                                                                                                                                                                                                    | 14169   |
| 14  | exp Bereavement/                                                                                                                                                                                              | 9620    |
| 15  | (grief or griev\$).mp. [mp=title, abstract, heading word, drug trade name, original title, device manufacturer, drug manufacturer, device trade name, keyword, floating subheading word, candidate term word] | 17523   |
| 16  | mourn\$.mp.                                                                                                                                                                                                   | 3434    |
| 17  | bereave\$.mp.                                                                                                                                                                                                 | 14326   |
| 18  | 13 or 14 or 15 or 16 or 17                                                                                                                                                                                    | 28872   |
| 19  | 12 and 18                                                                                                                                                                                                     | 294     |

APA PsycInfo (Ovid) – Search conducted June 22, 2021

| # ▲ | Searches                                                                                                                           | Results |
|-----|------------------------------------------------------------------------------------------------------------------------------------|---------|
| 1   | Suicide, Assisted/                                                                                                                 | 0       |
| 2   | euthanasia/ or euthanasia, active/ or euthanasia, passive/                                                                         | 1682    |
| 3   | exp Euthanasia, Active, Voluntary/                                                                                                 | 0       |
| 4   | exp Right to Die/                                                                                                                  | 0       |
| 5   | medical assistance in dying.mp.                                                                                                    | 66      |
| 6   | MAiD.mp.                                                                                                                           | 184     |
| 7   | physician aid in dying.mp.                                                                                                         | 24      |
| 8   | assisted suicide\$.mp.                                                                                                             | 1632    |
| 9   | assisted death\$.mp.                                                                                                               | 246     |
| 10  | euthanasia.mp.                                                                                                                     | 2688    |
| 11  | right to die.mp.                                                                                                                   | 604     |
| 12  | 1 or 2 or 3 or 4 or 5 or 6 or 7 or 8 or 9 or 10 or 11                                                                              | 3925    |
| 13  | exp Grief/                                                                                                                         | 13278   |
| 14  | exp Bereavement/                                                                                                                   | 15355   |
| 15  | (grief or griev\$).mp. [mp=title, abstract, heading word, table of contents, key concepts, original title, tests & measures, mesh] | 22336   |
| 16  | mourn\$.mp.                                                                                                                        | 5926    |
| 17  | bereave\$.mp.                                                                                                                      | 13090   |
| 18  | 13 or 14 or 15 or 16 or 17                                                                                                         | 29296   |
| 19  | 12 and 18                                                                                                                          | 202     |
| 20  | from 19 keep 1-202                                                                                                                 | 202     |

## Ageline – Search conducted June 22, 2021

| Search ID# | Search Terms                                                                                                                                             | Search Options                                                         | Actions                                                                                                                                                                                                       |
|------------|----------------------------------------------------------------------------------------------------------------------------------------------------------|------------------------------------------------------------------------|---------------------------------------------------------------------------------------------------------------------------------------------------------------------------------------------------------------|
| S15        |  ((mourm*) AND (S8 OR S9 OR S10 OR S11 OR S12 OR S13)) AND (S7 AND S14) | Expanders - Apply equivalent subjects<br>Search modes - Boolean/Phrase |  <a href="#">View Results</a> (7)         |
| S14        |  (mourm*) AND (S8 OR S9 OR S10 OR S11 OR S12 OR S13)                    | Expanders - Apply equivalent subjects<br>Search modes - Boolean/Phrase |  <a href="#">View Results</a> (223)                                                                                          |
| S13        |  mourm*                                                                 | Expanders - Apply equivalent subjects<br>Search modes - Boolean/Phrase |  <a href="#">View Results</a> (223)                                                                                          |
| S12        |  bereave*                                                               | Expanders - Apply equivalent subjects<br>Search modes - Boolean/Phrase |  <a href="#">View Results</a> (1,539)                                                                                        |
| S11        |  griev*                                                                 | Expanders - Apply equivalent subjects<br>Search modes - Boolean/Phrase |  <a href="#">View Results</a> (400)                                                                                          |
| S10        |  mourning                                                               | Expanders - Apply equivalent subjects<br>Search modes - Boolean/Phrase |  <a href="#">View Results</a> (849)                                                                                          |
| S9         |  bereavement                                                            | Expanders - Apply equivalent subjects<br>Search modes - Boolean/Phrase |  <a href="#">View Results</a> (1,726)                                                                                        |
| S8         |  grief                                                                  | Expanders - Apply equivalent subjects<br>Search modes - Boolean/Phrase |  <a href="#">View Results</a> (1,328)                                                                                        |
| S7         |  S1 OR S2 OR S3 OR S4 OR S5 OR S6                                       | Expanders - Apply equivalent subjects<br>Search modes - Boolean/Phrase |  <a href="#">View Results</a> (741)                                                                                          |
| S6         |  physician aid in dying                                                | Expanders - Apply equivalent subjects<br>Search modes - Boolean/Phrase |  <a href="#">View Results</a> (7)       |
| S5         |  maid                                                                 | Expanders - Apply equivalent subjects<br>Search modes - Boolean/Phrase |  <a href="#">View Results</a> (31)    |
| S4         |  medical assistance in dying                                          | Expanders - Apply equivalent subjects<br>Search modes - Boolean/Phrase |  <a href="#">View Results</a> (272)                                                                                        |
| S3         |  right to die                                                         | Expanders - Apply equivalent subjects<br>Search modes - Boolean/Phrase |  <a href="#">View Results</a> (243)                                                                                        |
| S2         |  euthanasia                                                           | Expanders - Apply equivalent subjects<br>Search modes - Boolean/Phrase |  <a href="#">View Results</a> (433)                                                                                        |
| S1         |  assisted suicide                                                     | Expanders - Apply equivalent subjects<br>Search modes - Boolean/Phrase |  <a href="#">View Results</a> (335)                                                                                        |

## CINAHL – Search conducted June 22, 2021

| Search ID# | Search Terms                                                             | Search Options                | Actions                                              |
|------------|--------------------------------------------------------------------------|-------------------------------|------------------------------------------------------|
| S17        | S10 AND S16                                                              | Search modes - Boolean/Phrase | <a href="#">View Results</a> (198) <a href="#">i</a> |
| S16        | S11 OR S12 OR S13 OR S14 OR S15                                          | Search modes - Boolean/Phrase | <a href="#">View Results</a> (19,932)                |
| S15        | "grief"                                                                  | Search modes - Boolean/Phrase | <a href="#">View Results</a> (4,030)                 |
| S14        | "bereave"                                                                | Search modes - Boolean/Phrase | <a href="#">View Results</a> (10,972)                |
| S13        | "mourn"                                                                  | Search modes - Boolean/Phrase | <a href="#">View Results</a> (1,375)                 |
| S12        | (MH "Bereavement")                                                       | Search modes - Boolean/Phrase | <a href="#">View Results</a> (8,026)                 |
| S11        | (MH "Grief") OR (MH "Complicated Grief") OR (MH "Anticipatory Grieving") | Search modes - Boolean/Phrase | <a href="#">View Results</a> (8,805)                 |
| S10        | S1 OR S2 OR S3 OR S4 OR S5 OR S6 OR S7 OR S8 OR S9                       | Search modes - Boolean/Phrase | <a href="#">View Results</a> (12,726)                |
| S9         | "right to die"                                                           | Search modes - Boolean/Phrase | <a href="#">View Results</a> (1,817)                 |
| S8         | "euthanasia"                                                             | Search modes - Boolean/Phrase | <a href="#">View Results</a> (9,092)                 |
| S7         | "assisted death"                                                         | Search modes - Boolean/Phrase | <a href="#">View Results</a> (333) <a href="#">i</a> |
| S6         | "assisted suicide"                                                       | Search modes - Boolean/Phrase | <a href="#">View Results</a> (1,823)                 |
| S5         | "MAID"                                                                   | Search modes - Boolean/Phrase | <a href="#">View Results</a> (231) <a href="#">i</a> |
| S4         | "medical assistance in dying"                                            | Search modes - Boolean/Phrase | <a href="#">View Results</a> (203) <a href="#">i</a> |
| S3         | (MH "Right to Die")                                                      | Search modes - Boolean/Phrase | <a href="#">View Results</a> (1,670)                 |
| S2         | (MH "Euthanasia") OR (MH "Euthanasia, Passive")                          | Search modes - Boolean/Phrase | <a href="#">View Results</a> (8,156)                 |
| S1         | (MH "Suicide, Assisted")                                                 | Search modes - Boolean/Phrase | <a href="#">View Results</a> (3,783)                 |

## Scopus – Search conducted June 22, 2021

## 401 document results

TITLE-ABS-KEY ("assisted suicide" OR "euthanasia" OR "right to die" OR "medical assistance in dying" OR "physician aid in dying" OR "assisted death") AND TITLE-ABS-KEY ("grief" OR "grieving" OR "bereavement" OR "bereaved" OR "mourning" OR "mourn")
